# Supplementary material for: Biochar reduces early-stage mineralization rates of plant residues more in coarse-textured soils than in fine-textured soils – an artificial-soil approach
Source: Copernicus journal article supplement (doi:10.5194/soil-11-141-2025), 2025-02-04
Supplement: Supplementary file 1 [file soil-11-141-2025-supplement.pdf]

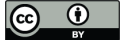

*Supplement of*

**Biochar reduces early-stage mineralization rates of plant residues more in coarse-textured soils than in fine-textured soils – an artificial-soil approach**

**Thiago M. Inagaki et al.**

*Correspondence to:* Thiago M. Inagaki ([thiago.inagaki@nibio.no](mailto:thiago.inagaki@nibio.no)) and Franziska B. Bucka ([bucka@em.uni-frankfurt.de](mailto:bucka@em.uni-frankfurt.de))

The copyright of individual parts of the supplement might differ from the article licence.

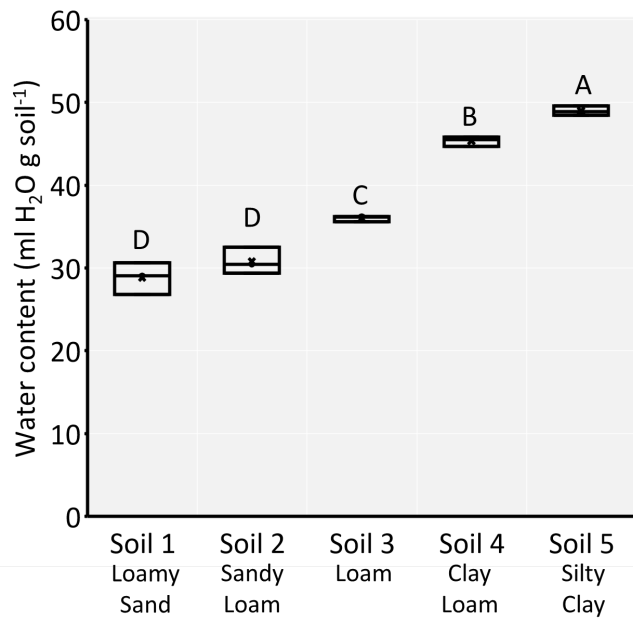

Figure S1: Maximum water hold capacity of artificial soils. Different uppercase letters represent significant differences among the soils by the LSD test at  $p < 0.05$ . Boxplots represent the third quartile, the median, and the first quartile range of the data

Table S1: Biochar general characterization.

| Property                                                          | Value  |
|-------------------------------------------------------------------|--------|
| Specific Surface Area ( $\text{m}^2 \text{g}^{-1}$ ) <sup>a</sup> | 402.95 |
| Ash content (%) <sup>b</sup>                                      | 1.1    |
| C content (%) <sup>c</sup>                                        | 95.6   |
| N content (%) <sup>c</sup>                                        | 3.9    |
| H (%) <sup>c</sup>                                                | 0.9    |
| Total Inorganic C (%) <sup>d</sup>                                | <0.1   |
| H/C ratio (molar)                                                 | 0.11   |
| O/C ratio (molar)                                                 | 0.02   |
| pH in $\text{CaCl}_2$ <sup>e</sup>                                | 7.7    |
| Electrical Conductivity ( $\mu\text{S cm}^{-1}$ )                 | 87     |

a: DIN ISO 9277, b: DIN 51719: 1997-07, c: DIN 51732: 2014, d: DIN 51726: 2004-06, e: DIN ISO 10390:2005-12, f: BGK III. C2: 2006-09
